# Supplementary material for: Enumerating all maximal frequent subtrees in collections of phylogenetic trees
Source: Springer Nature journal article supplement (doi:10.1186/1748-7188-9-16), 2014-06-18

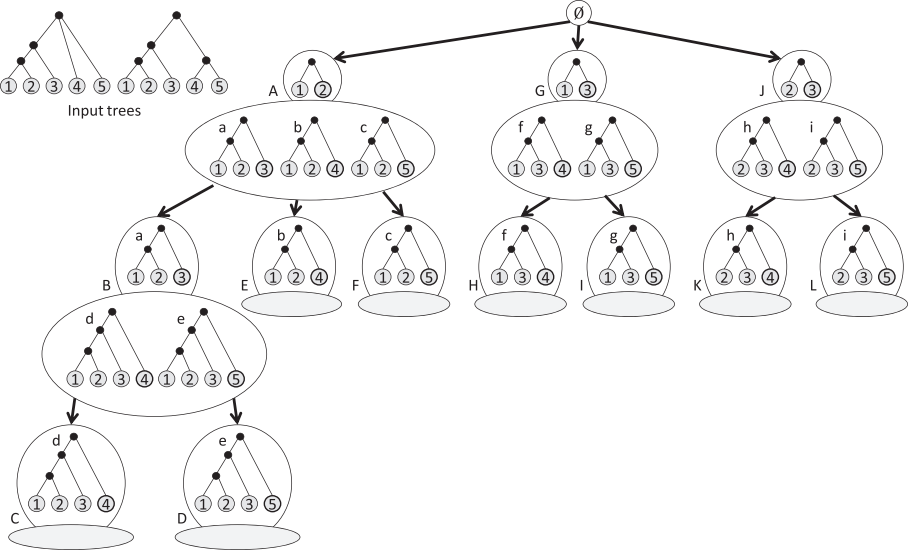

Supplement: 13015_2013_215_MOESM6_ESM.pdf [file 13015_2013_215_MOESM6_ESM.pdf]
