# Supplementary material for: Enumerating all maximal frequent subtrees in collections of phylogenetic trees
Source: Springer Nature journal article supplement (doi:10.1186/1748-7188-9-16), 2014-06-18
Supplement: 13015_2013_215_MOESM14_ESM.pdf [file 13015_2013_215_MOESM14_ESM.pdf]

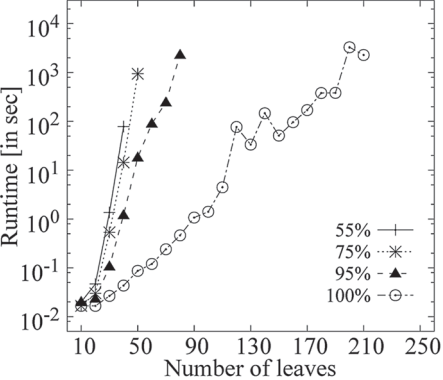

(a)

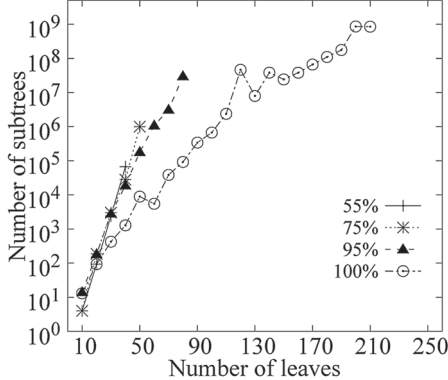

(b)

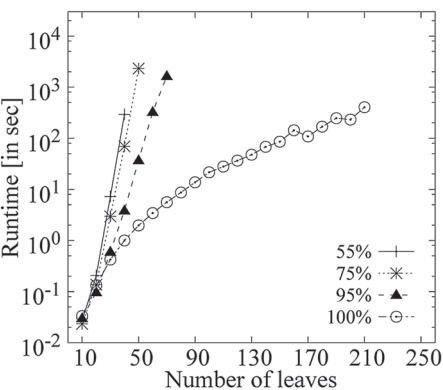

(c)

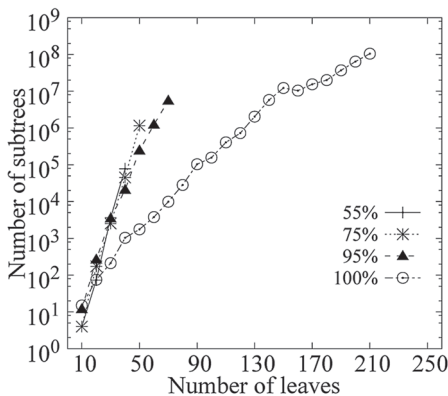

(d)

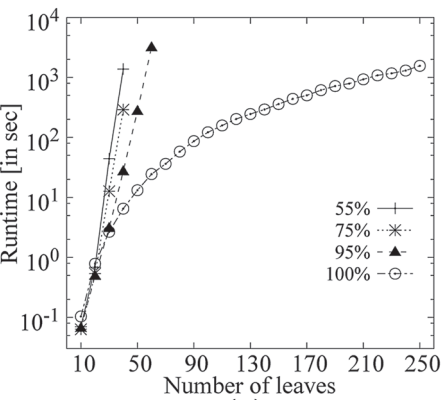

(e)

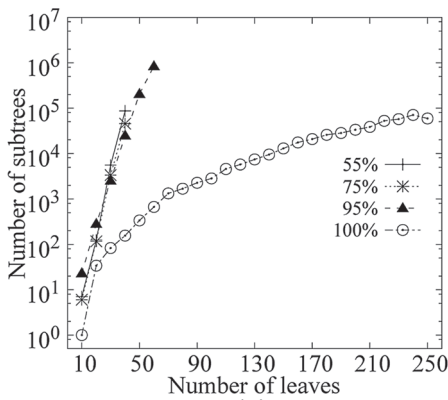

(f)
